# Supplementary material for: Self-consistent determination of the fictitious temperature in thermally-assisted-occupation density functional theory
Source: Royal Society of Chemistry journal article supplement (doi:10.1039/c7ra10241k), 2017-01-01
Supplement: c7ra10241k1.pdf [file c7ra10241k1.pdf]

## Supplementary material to: Self-consistent determination of the fictitious temperature in thermally-assisted-occupation density functional theory

Chih-Ying Lin,<sup>1</sup> Kerwin Hui,<sup>1</sup> Jui-Hui Chung,<sup>1</sup> and Jeng-Da Chai<sup>1,2,\*</sup>

<sup>1</sup>*Department of Physics, National Taiwan University, Taipei 10617, Taiwan*

<sup>2</sup>*Center for Theoretical Sciences and Center for Quantum Science and Engineering,  
National Taiwan University, Taipei 10617, Taiwan*

References (S2).

FIG. S1. Potential energy curves for the ground state of H<sub>2</sub> (S3).

FIG. S2. Occupation numbers of the 1σ<sub>g</sub> orbital for the ground state of H<sub>2</sub> as a function of the internuclear distance *R* (S4).

FIG. S3. Potential energy curves for the ground state of N<sub>2</sub> (S4 to S5).

FIG. S4. Occupation numbers of the 3σ<sub>g</sub> orbital for the ground state of N<sub>2</sub> as a function of the internuclear distance *R* (S5 to S6).

FIG. S5. Occupation numbers of the 1π<sub>ux</sub> orbital for the ground state of N<sub>2</sub> as a function of the internuclear distance *R* (S6).

FIG. S6. Torsion potential energy curves for the ground state of twisted ethylene as a function of the HCCH torsion angle (S7).

FIG. S7. Occupation numbers of the π (1b<sub>2</sub>) orbital for the ground state of twisted ethylene as a function of the HCCH torsion angle (S8).

TABLE S1. Reaction energies of the 30 chemical reactions in the NHTBH38/04 and HTBH38/04 sets (S8 to S9).

TABLE S2. Non-hydrogen transfer barrier heights of the NHTBH38/04 set (S9 to S10).

TABLE S3. Hydrogen transfer barrier heights of the HTBH38/04 set (S10 to S11).

TABLE S4. Interaction energies of the S22 set (S11 to S12).

---

\* Author to whom correspondence should be addressed. Electronic mail: jdchai@phys.ntu.edu.tw

- 
- [1] T. Helgaker, P. Jørgensen, and J. Olsen, *Molecular Electronic-Structure Theory*, Wiley, New York, 2000.
  - [2] K. P. Huber and G. Herzberg, in *Constants of Diatomic Molecules*, Van Nostrand Reinhold, New York, 1979, pp. 412.
  - [3] D. Sundholm, P. Pyykko, and L. Laaksonen, *Mol. Phys.*, 1985, **56**, 1411–1418.
  - [4] M. S. Gordon *et al.*, *J. Chem. Phys.*, 1999, **110**, 4199–4207.
  - [5] X. Lopez, M. Piris, J. M. Matxain, F. Ruipérez, and J. M. Ugalde, *ChemPhysChem*, 2011, **12**, 1673–1676.
  - [6] R. G. A. Bone and P. Pulay, *Int. J. Quantum Chem.*, 1992, **45**, 133–166.
  - [7] Y. Zhao, B. J. Lynch, and D. G. Truhlar, *J. Phys. Chem. A*, 2004, **108**, 2715–2719.
  - [8] Y. Zhao, N. González-García, and D. G. Truhlar, *J. Phys. Chem. A*, 2005, **109**, 2012–2018.
  - [9] P. Jurečka, J. Šponer, J. Černý, and P. Hobza, *Phys. Chem. Chem. Phys.*, 2006, **8**, 1985–1993.

## FIGURES

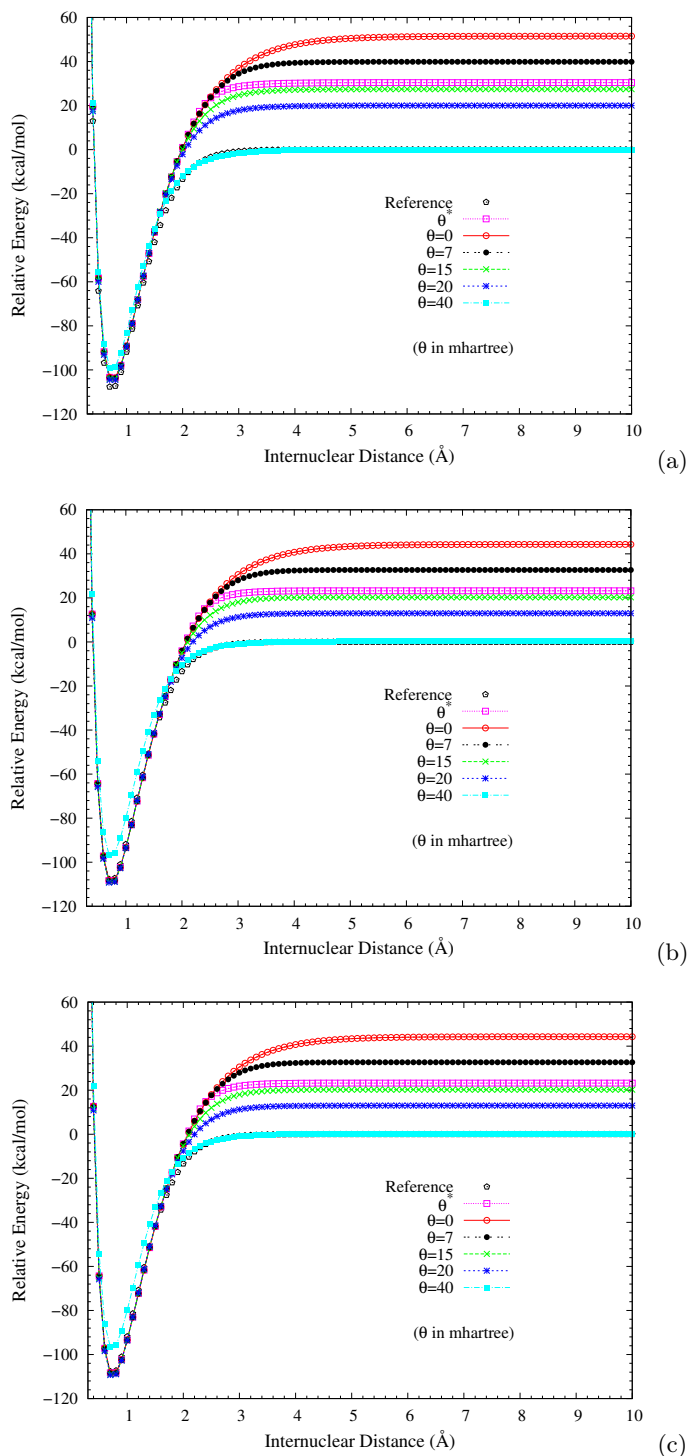

FIG. S1. Potential energy curves (in relative energy) for the ground state of  $\text{H}_2$ , calculated using spin-restricted (a) TAO-PBE, (b) TAO-BLYP, and (c) TAO-BLYP-D with the  $\theta^*$  and system-independent  $\theta$  values. The  $\theta = 0$  cases correspond to spin-restricted (a) KS-PBE, (b) KS-BLYP, and (c) KS-BLYP-D, respectively. The reference curve is calculated using the CCSD theory (exact for any two-electron system). The zeros of energy are set at the respective spin-unrestricted dissociation limits.

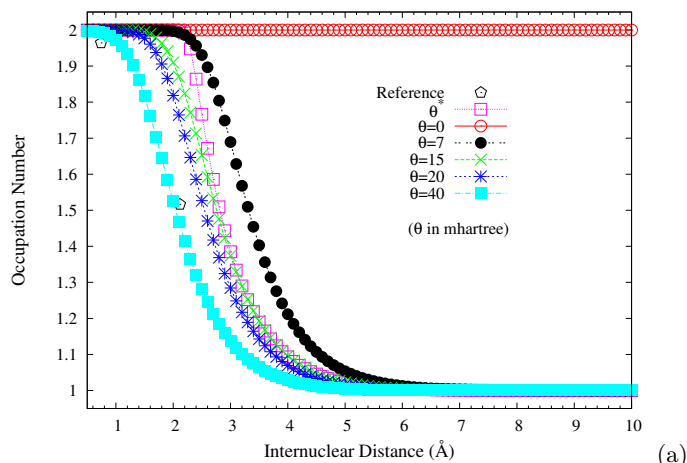

(a)

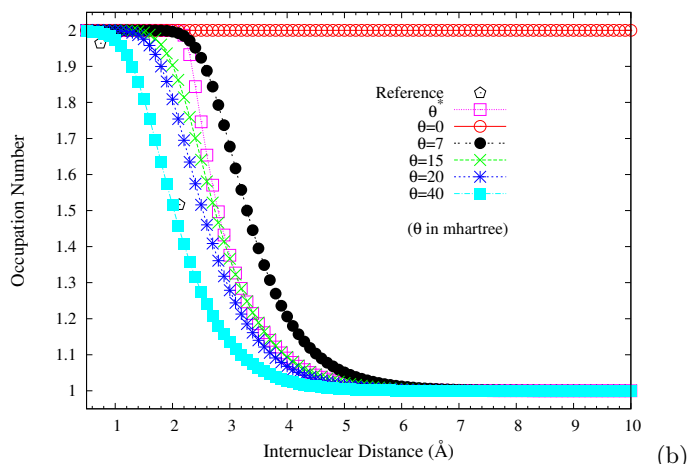

(b)

FIG. S2. Occupation numbers of the  $1\sigma_g$  orbital for the ground state of  $H_2$  as a function of the internuclear distance  $R$ , calculated using spin-restricted (a) TAO-PBE and (b) TAO-BLYP/TAO-BLYP-D with the  $\theta^*$  and system-independent  $\theta$  values. The  $\theta = 0$  cases correspond to spin-restricted (a) KS-PBE and (b) KS-BLYP/KS-BLYP-D, respectively. The reference data are the FCI NOONs [1].

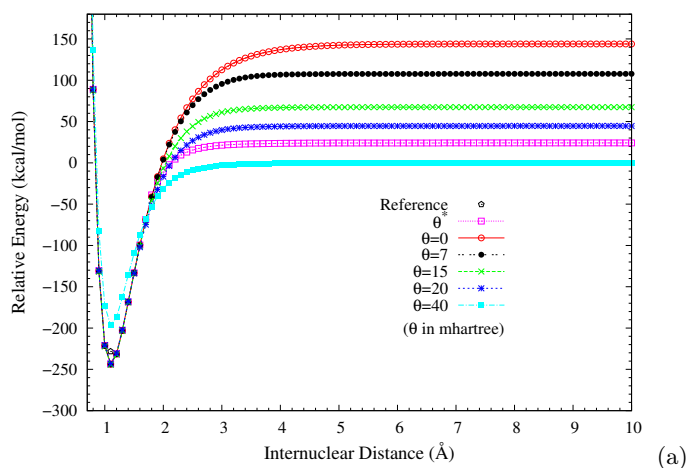

(a)

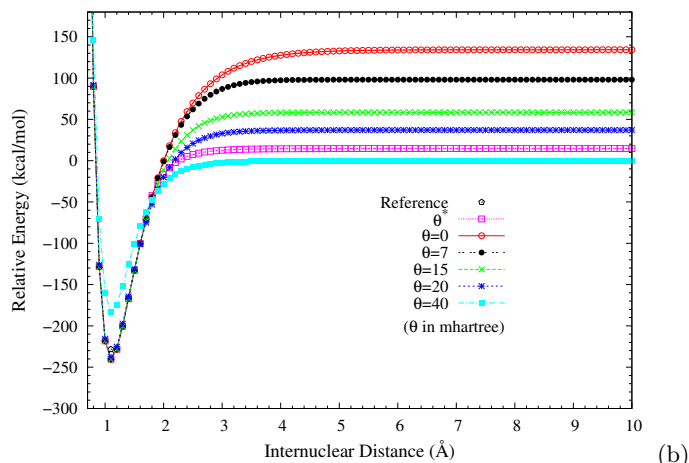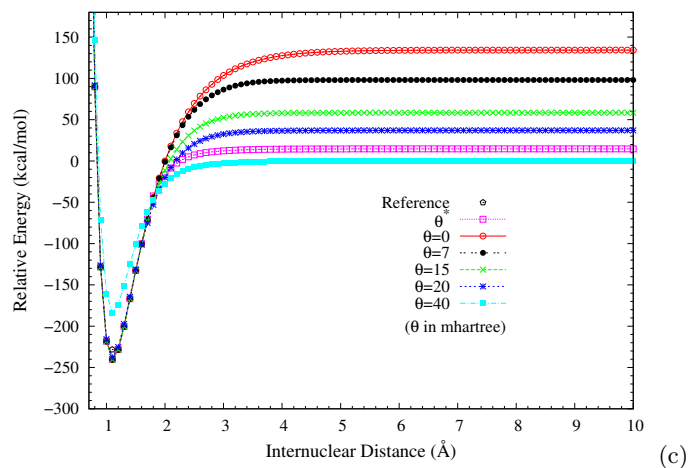

FIG. S3. Potential energy curves (in relative energy) for the ground state of  $N_2$ , calculated using spin-restricted (a) TAO-PBE, (b) TAO-BLYP, and (c) TAO-BLYP-D with the  $\theta^*$  and system-independent  $\theta$  values. The  $\theta = 0$  cases correspond to spin-restricted (a) KS-PBE, (b) KS-BLYP, and (c) KS-BLYP-D, respectively. The reference data ( $-228.3$  kcal/mol) at  $R = 1.098$   $\text{\AA}$  (i.e., the equilibrium bond length) are the experimental results [2, 3]. The zeros of energy are set at the respective spin-unrestricted dissociation limits.

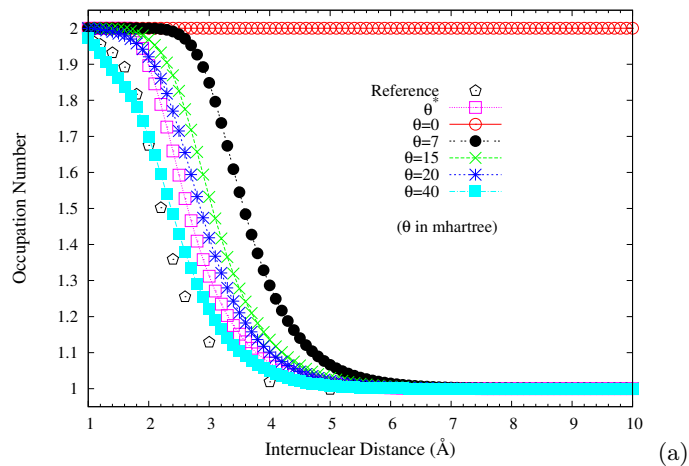

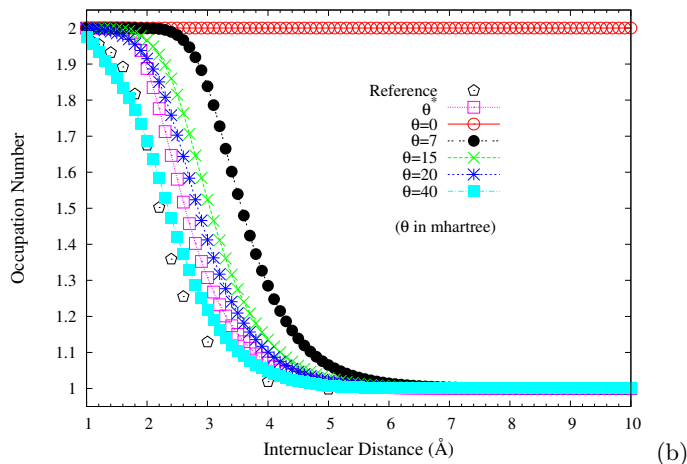

FIG. S4. Occupation numbers of the  $3\sigma_g$  orbital for the ground state of  $N_2$  as a function of the internuclear distance  $R$ , calculated using spin-restricted (a) TAO-PBE and (b) TAO-BLYP/TAO-BLYP-D with the  $\theta^*$  and system-independent  $\theta$  values. The  $\theta = 0$  cases correspond to spin-restricted (a) KS-PBE and (b) KS-BLYP/KS-BLYP-D, respectively. The reference data are the NOONs of the MRCI method [4].

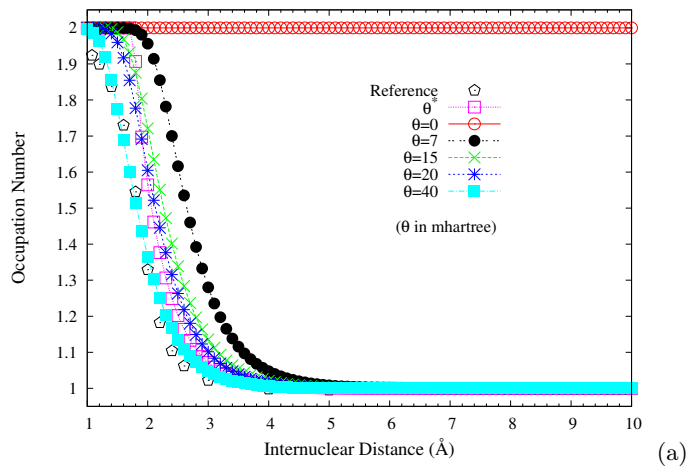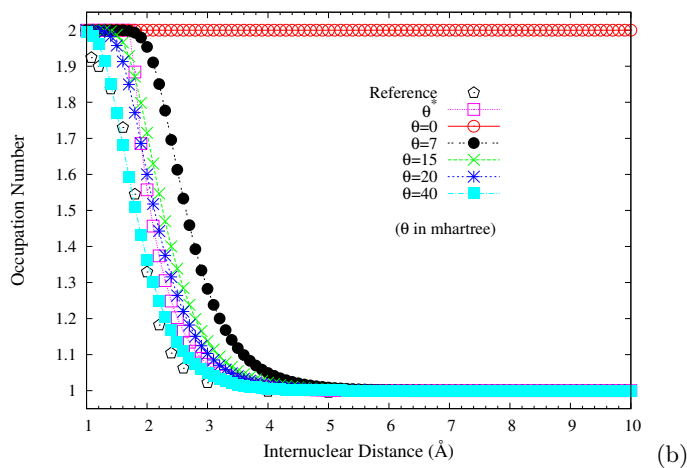

FIG. S5. Occupation numbers of the  $1\pi_{ux}$  orbital for the ground state of  $N_2$  as a function of the internuclear distance  $R$ , calculated using spin-restricted (a) TAO-PBE and (b) TAO-BLYP/TAO-BLYP-D with the  $\theta^*$  and system-independent  $\theta$  values. The  $\theta = 0$  cases correspond to spin-restricted (a) KS-PBE and (b) KS-BLYP/KS-BLYP-D, respectively. The reference data are the NOONs of the MRCI method [4].

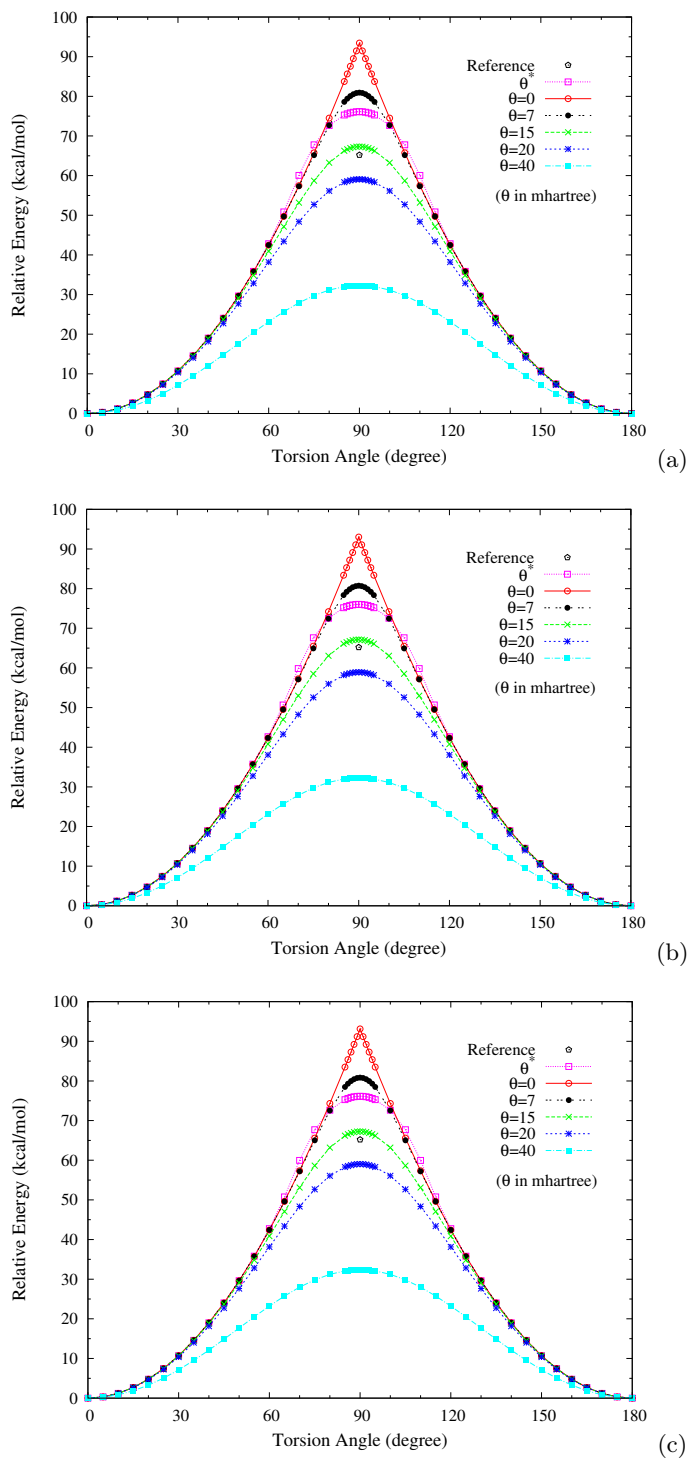

FIG. S6. Torsion potential energy curves (in relative energy) for the ground state of twisted ethylene as a function of the HCCH torsion angle, calculated using spin-restricted (a) TAO-PBE, (b) TAO-BLYP, and (c) TAO-BLYP-D with the  $\theta^*$  and system-independent  $\theta$  values. The  $\theta = 0$  cases correspond to spin-restricted (a) KS-PBE, (b) KS-BLYP, and (c) KS-BLYP-D, respectively. The reference data are the CASPT2 results [5]. The zeros of energy are set at the respective minimum energies.

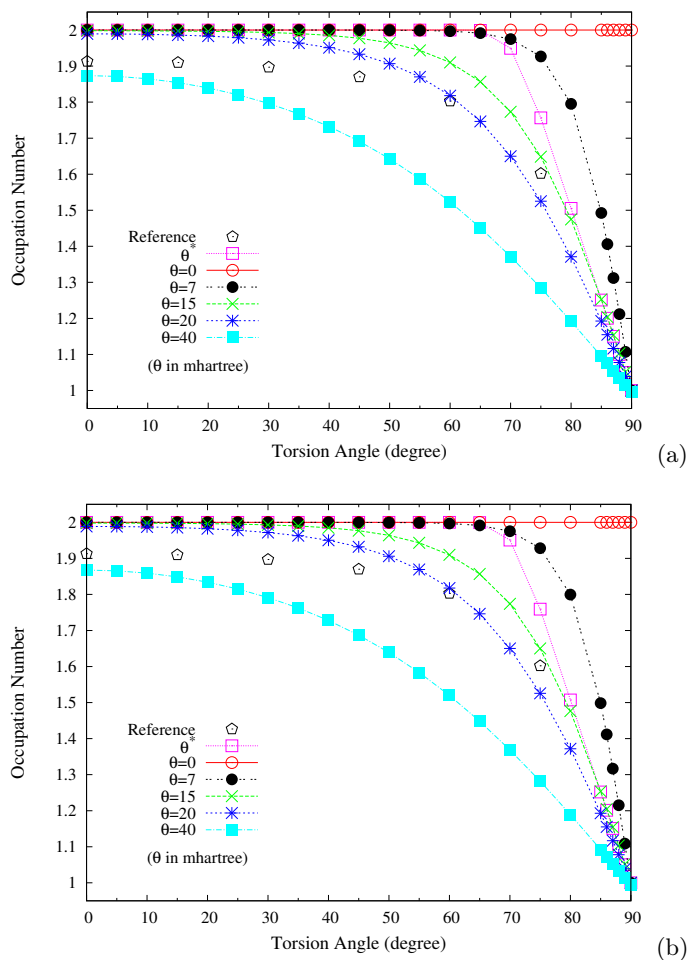

FIG. S7. Occupation numbers of the  $\pi$  ( $1b_2$ ) orbital for the ground state of twisted ethylene as a function of the HCCH torsion angle, calculated using spin-restricted (a) TAO-PBE and (b) TAO-BLYP/TAO-BLYP-D with the  $\theta^*$  and system-independent  $\theta$  values. The  $\theta = 0$  cases correspond to spin-restricted (a) KS-PBE and (b) KS-BLYP/KS-BLYP-D, respectively. The reference data are the half-projected NOONs of the CASSCF method (HPNO-CAS) [6].

## TABLES

TABLE S1. Comparison of errors of the reaction energies (in kcal/mol) of the 30 chemical reactions in the NHTBH38/04 and HTBH38/04 sets [7, 8].

| Reactions                                                                            | $\Delta E_{ref}$ | with $\theta^*$ |         |          |            |
|--------------------------------------------------------------------------------------|------------------|-----------------|---------|----------|------------|
|                                                                                      |                  | TAO-LDA         | TAO-PBE | TAO-BLYP | TAO-BLYP-D |
| $\text{H} + \text{N}_2\text{O} \rightarrow \text{OH} + \text{N}_2$                   | -65.08           | 35.68           | 22.59   | 11.96    | 12.03      |
| $\text{H} + \text{FCH}_3 \rightarrow \text{HF} + \text{CH}_3$                        | -26.64           | 8.28            | 4.16    | 0.49     | 0.63       |
| $\text{H} + \text{F}_2 \rightarrow \text{HF} + \text{F}$                             | -103.91          | 18.54           | 13.19   | 10.10    | 10.10      |
| $\text{CH}_3 + \text{FCl} \rightarrow \text{CH}_3\text{F} + \text{Cl}$               | -52.74           | 3.56            | 4.63    | 4.00     | 3.85       |
| $\text{F}^- + \text{CH}_3\text{Cl} \rightarrow \text{FCH}_3 + \text{Cl}^-$           | -32.65           | -0.90           | 0.82    | 0.27     | 0.37       |
| $\text{F}^- \cdots \text{CH}_3\text{Cl} \rightarrow \text{FCH}_3 \cdots \text{Cl}^-$ | -26.73           | 3.98            | 4.41    | 3.83     | 3.90       |
| $\text{OH}^- + \text{CH}_3\text{F} \rightarrow \text{HOCH}_3 + \text{F}^-$           | -20.11           | -0.74           | -1.09   | -0.41    | -0.92      |
| $\text{OH}^- \cdots \text{CH}_3\text{F} \rightarrow \text{HOCH}_3 \cdots \text{F}^-$ | -36.24           | -11.06          | -8.12   | -5.50    | -5.52      |



|                                                                                                   |        |        |       |       |       |
|---------------------------------------------------------------------------------------------------|--------|--------|-------|-------|-------|
| H + N <sub>2</sub> → HN <sub>2</sub>                                                              | 3.97   | -15.60 | -7.86 | -7.24 | -7.28 |
| H + CO → HCO                                                                                      | -19.51 | -14.40 | -6.84 | -5.78 | -5.87 |
| H + C <sub>2</sub> H <sub>4</sub> → CH <sub>3</sub> CH <sub>2</sub>                               | -40.03 | -4.52  | -0.31 | 1.22  | 0.62  |
| CH <sub>3</sub> + C <sub>2</sub> H <sub>4</sub> → CH <sub>3</sub> CH <sub>2</sub> CH <sub>2</sub> | -26.12 | -12.64 | -2.14 | 5.96  | 3.47  |
| HCN → HNC                                                                                         | 15.05  | -0.83  | 0.06  | 0.02  | 0.09  |
| H + HCl → H <sub>2</sub> + Cl                                                                     | -3.0   | 11.13  | 5.51  | -1.29 | -1.29 |
| OH + H <sub>2</sub> → H + H <sub>2</sub> O                                                        | -16.1  | -13.62 | -3.95 | 2.22  | 2.19  |
| CH <sub>3</sub> + H <sub>2</sub> → H + CH <sub>4</sub>                                            | -3.2   | -7.09  | -2.30 | 2.70  | 2.55  |
| OH + CH <sub>4</sub> → CH <sub>3</sub> + H <sub>2</sub> O                                         | -12.9  | -6.53  | -1.65 | -0.48 | -0.36 |
| OH + NH <sub>3</sub> → H <sub>2</sub> O + NH <sub>2</sub>                                         | -9.5   | -3.67  | -1.73 | -1.51 | -1.43 |
| HCl + CH <sub>3</sub> → Cl + CH <sub>4</sub>                                                      | -6.2   | 4.04   | 3.21  | 1.41  | 1.26  |
| OH + C <sub>2</sub> H <sub>6</sub> → H <sub>2</sub> O + C <sub>2</sub> H <sub>5</sub>             | -16.5  | -9.27  | -3.29 | -1.97 | -1.30 |
| F + H <sub>2</sub> → HF + H                                                                       | -31.6  | -18.31 | -6.49 | -0.72 | -0.72 |
| O + CH <sub>4</sub> → OH + CH <sub>3</sub>                                                        | 5.6    | -7.02  | -5.83 | -5.84 | -5.69 |
| H + PH <sub>3</sub> → PH <sub>2</sub> + H <sub>2</sub>                                            | -20.1  | 3.51   | 0.40  | -4.10 | -3.42 |
| H + HO → H <sub>2</sub> + O                                                                       | -2.4   | 14.11  | 8.12  | 3.14  | 3.14  |
| H + H <sub>2</sub> S → H <sub>2</sub> + HS                                                        | -13.8  | 7.93   | 3.48  | -2.41 | -2.15 |
| O + HCl → OH + Cl                                                                                 | -0.6   | -2.98  | -2.61 | -4.43 | -4.43 |
| NH <sub>2</sub> + CH <sub>3</sub> → CH <sub>4</sub> + NH                                          | -14.4  | 3.87   | 4.55  | 4.66  | 4.56  |
| NH <sub>2</sub> + C <sub>2</sub> H <sub>5</sub> → C <sub>2</sub> H <sub>6</sub> + NH              | -10.8  | 6.62   | 6.19  | 6.15  | 5.49  |
| C <sub>2</sub> H <sub>6</sub> + NH <sub>2</sub> → NH <sub>3</sub> + C <sub>2</sub> H <sub>5</sub> | -7.0   | -5.61  | -1.55 | -0.46 | 0.14  |
| NH <sub>2</sub> + CH <sub>4</sub> → CH <sub>3</sub> + NH <sub>3</sub>                             | -3.3   | -2.96  | -0.02 | 0.94  | 0.97  |
| MSE                                                                                               |        | -0.55  | 0.85  | 0.56  | 0.50  |
| MAE                                                                                               |        | 8.63   | 4.57  | 3.37  | 3.19  |
| rms                                                                                               |        | 11.19  | 6.39  | 4.47  | 4.31  |
| Max(-)                                                                                            |        | -18.31 | -8.12 | -7.24 | -7.28 |
| Max(+)                                                                                            |        | 35.68  | 22.59 | 11.96 | 12.03 |

TABLE S2. Non-hydrogen transfer barrier heights (in kcal/mol) of the NHTBH38/04 set [7, 8].

| Reactions                                                                  | $\Delta E_{ref}$ | with $\theta^*$ |         |          |            |        |
|----------------------------------------------------------------------------|------------------|-----------------|---------|----------|------------|--------|
|                                                                            |                  | TAO-LDA         | TAO-PBE | TAO-BLYP | TAO-BLYP-D |        |
| <b>Heavy-atom transfer reactions</b>                                       |                  |                 |         |          |            |        |
| H + N <sub>2</sub> O → OH + N <sub>2</sub>                                 | $V^f$            | 18.14           | 2.69    | 9.97     | 8.54       | 8.19   |
|                                                                            | $V^r$            | 83.22           | 32.09   | 52.46    | 61.67      | 61.24  |
| H + FH → HF + H                                                            | $V^f$            | 42.18           | 18.48   | 27.07    | 26.03      | 25.76  |
|                                                                            | $V^r$            | 42.18           | 18.48   | 27.07    | 26.03      | 25.76  |
| H + ClH → HCl + H                                                          | $V^f$            | 18.00           | 2.27    | 9.64     | 9.80       | 9.74   |
|                                                                            | $V^r$            | 18.00           | 2.27    | 9.64     | 9.80       | 9.74   |
| H + FCH <sub>3</sub> → HF + CH <sub>3</sub>                                | $V^f$            | 30.38           | 13.36   | 18.51    | 16.12      | 15.33  |
|                                                                            | $V^r$            | 57.02           | 31.72   | 41.00    | 42.27      | 41.33  |
| H + F <sub>2</sub> → HF + F                                                | $V^f$            | 2.27            | -15.97  | -9.86    | -11.66     | -11.78 |
|                                                                            | $V^r$            | 106.18          | 69.40   | 80.86    | 82.15      | 82.03  |
| CH <sub>3</sub> + FCl → CH <sub>3</sub> F + Cl                             | $V^f$            | 7.43            | -10.90  | -6.01    | -6.39      | -7.87  |
|                                                                            | $V^r$            | 60.17           | 38.28   | 42.10    | 42.35      | 41.02  |
| <b>Nucleophilic substitution reactions</b>                                 |                  |                 |         |          |            |        |
| F <sup>-</sup> + CH <sub>3</sub> F → FCH <sub>3</sub> + F <sup>-</sup>     | $V^f$            | -0.34           | -12.18  | -8.31    | -7.90      | -8.95  |
|                                                                            | $V^r$            | -0.34           | -12.18  | -8.31    | -7.90      | -8.95  |
| F <sup>-</sup> ...CH <sub>3</sub> F → FCH <sub>3</sub> ...F <sup>-</sup>   | $V^f$            | 13.38           | 6.34    | 6.41     | 5.72       | 6.07   |
|                                                                            | $V^r$            | 13.38           | 6.34    | 6.41     | 5.72       | 6.07   |
| Cl <sup>-</sup> + CH <sub>3</sub> Cl → ClCH <sub>3</sub> + Cl <sup>-</sup> | $V^f$            | 3.10            | -6.73   | -3.80    | -3.95      | -5.69  |

|                                                                                        |       |        |        |        |        |        |
|----------------------------------------------------------------------------------------|-------|--------|--------|--------|--------|--------|
|                                                                                        | $V^r$ | 3.10   | -6.73  | -3.80  | -3.95  | -5.69  |
| $\text{Cl}^- \cdots \text{CH}_3\text{Cl} \rightarrow \text{ClCH}_3 \cdots \text{Cl}^-$ | $V^f$ | 13.61  | 6.70   | 7.07   | 5.58   | 5.41   |
|                                                                                        | $V^r$ | 13.61  | 6.70   | 7.07   | 5.58   | 5.41   |
| $\text{F}^- + \text{CH}_3\text{Cl} \rightarrow \text{FCH}_3 + \text{Cl}^-$             | $V^f$ | -12.54 | -23.45 | -19.52 | -19.35 | -20.67 |
|                                                                                        | $V^r$ | 20.11  | 10.10  | 12.31  | 13.03  | 11.62  |
| $\text{F}^- \cdots \text{CH}_3\text{Cl} \rightarrow \text{FCH}_3 \cdots \text{Cl}^-$   | $V^f$ | 2.89   | -1.13  | -0.94  | -2.01  | -1.89  |
|                                                                                        | $V^r$ | 29.62  | 21.62  | 21.38  | 20.89  | 20.94  |
| $\text{OH}^- + \text{CH}_3\text{F} \rightarrow \text{HOCH}_3 + \text{F}^-$             | $V^f$ | -2.78  | -15.12 | -11.99 | -11.35 | -13.14 |
|                                                                                        | $V^r$ | 17.33  | 5.73   | 9.21   | 9.17   | 7.89   |
| $\text{OH}^- \cdots \text{CH}_3\text{F} \rightarrow \text{HOCH}_3 \cdots \text{F}^-$   | $V^f$ | 10.96  | 0.23   | -1.14  | -1.49  | -2.05  |
|                                                                                        | $V^r$ | 47.20  | 47.53  | 43.23  | 40.25  | 39.71  |
| <b>Unimolecular and association reactions</b>                                          |       |        |        |        |        |        |
| $\text{H} + \text{N}_2 \rightarrow \text{HN}_2$                                        | $V^f$ | 14.69  | -2.19  | 5.19   | 5.24   | 5.08   |
|                                                                                        | $V^r$ | 10.72  | 9.44   | 9.08   | 8.51   | 8.38   |
| $\text{H} + \text{CO} \rightarrow \text{HCO}$                                          | $V^f$ | 3.17   | -7.57  | -1.69  | -1.95  | -2.25  |
|                                                                                        | $V^r$ | 22.68  | 26.34  | 24.66  | 23.34  | 23.13  |
| $\text{H} + \text{C}_2\text{H}_4 \rightarrow \text{CH}_3\text{CH}_2$                   | $V^f$ | 1.72   | -5.34  | -0.14  | -0.69  | -1.78  |
|                                                                                        | $V^r$ | 41.75  | 39.21  | 40.20  | 38.11  | 37.63  |
| $\text{CH}_3 + \text{C}_2\text{H}_4 \rightarrow \text{CH}_3\text{CH}_2\text{CH}_2$     | $V^f$ | 6.85   | -5.81  | 1.50   | 4.73   | 1.48   |
|                                                                                        | $V^r$ | 32.97  | 32.95  | 29.76  | 24.88  | 24.13  |
| $\text{HCN} \rightarrow \text{HNC}$                                                    | $V^f$ | 48.16  | 44.83  | 45.60  | 46.76  | 46.94  |
|                                                                                        | $V^r$ | 33.11  | 30.60  | 30.50  | 31.68  | 31.80  |
| MSE                                                                                    |       |        | -12.50 | -8.71  | -8.89  | -9.53  |
| MAE                                                                                    |       |        | 12.71  | 8.81   | 8.93   | 9.55   |
| rms                                                                                    |       |        | 16.16  | 10.75  | 10.42  | 10.98  |
| Max(-)                                                                                 |       |        | -51.13 | -30.76 | -24.03 | -24.15 |
| Max(+)                                                                                 |       |        | 3.66   | 1.98   | 0.66   | 0.45   |

TABLE S3. Hydrogen transfer barrier heights (in kcal/mol) of the HTBH38/04 set [7, 8].

| Reactions                                                                                | $\Delta E_{ref}$ | with $\theta^*$ |         |          |            |        |
|------------------------------------------------------------------------------------------|------------------|-----------------|---------|----------|------------|--------|
|                                                                                          |                  | TAO-LDA         | TAO-PBE | TAO-BLYP | TAO-BLYP-D |        |
| $\text{H} + \text{HCl} \rightarrow \text{H}_2 + \text{Cl}$                               | $V^f$            | 5.7             | -3.14   | 0.56     | -2.45      | -2.58  |
|                                                                                          | $V^r$            | 8.7             | -11.27  | -1.95    | 1.84       | 1.71   |
| $\text{OH} + \text{H}_2 \rightarrow \text{H} + \text{H}_2\text{O}$                       | $V^f$            | 5.1             | -18.39  | -6.36    | -3.49      | -3.95  |
|                                                                                          | $V^r$            | 21.2            | 11.33   | 13.69    | 10.39      | 9.96   |
| $\text{CH}_3 + \text{H}_2 \rightarrow \text{H} + \text{CH}_4$                            | $V^f$            | 12.1            | -5.35   | 3.82     | 7.14       | 5.96   |
|                                                                                          | $V^r$            | 15.3            | 4.94    | 9.32     | 7.65       | 6.61   |
| $\text{OH} + \text{CH}_4 \rightarrow \text{CH}_3 + \text{H}_2\text{O}$                   | $V^f$            | 6.7             | -17.22  | -5.65    | -2.75      | -4.01  |
|                                                                                          | $V^r$            | 19.6            | 2.21    | 8.91     | 10.63      | 9.24   |
| $\text{H} + \text{H}_2 \rightarrow \text{H}_2 + \text{H}$                                | $V^f$            | 9.6             | -2.70   | 3.64     | 2.86       | 2.67   |
|                                                                                          | $V^r$            | 9.6             | -2.70   | 3.64     | 2.86       | 2.67   |
| $\text{OH} + \text{NH}_3 \rightarrow \text{H}_2\text{O} + \text{NH}_2$                   | $V^f$            | 3.2             | -23.88  | -11.94   | -9.20      | -10.46 |
|                                                                                          | $V^r$            | 12.7            | -10.71  | -0.71    | 1.81       | 0.47   |
| $\text{HCl} + \text{CH}_3 \rightarrow \text{Cl} + \text{CH}_4$                           | $V^f$            | 1.7             | -13.74  | -5.94    | -3.51      | -5.09  |
|                                                                                          | $V^r$            | 7.9             | -11.58  | -2.95    | 1.29       | -0.15  |
| $\text{OH} + \text{C}_2\text{H}_6 \rightarrow \text{H}_2\text{O} + \text{C}_2\text{H}_5$ | $V^f$            | 3.4             | -20.98  | -9.03    | -6.12      | -7.54  |
|                                                                                          | $V^r$            | 19.9            | 4.79    | 10.76    | 12.36      | 10.26  |
| $\text{F} + \text{H}_2 \rightarrow \text{HF} + \text{H}$                                 | $V^f$            | 1.8             | -24.20  | -12.97   | -11.61     | -11.86 |
|                                                                                          | $V^r$            | 33.4            | 25.71   | 25.12    | 20.70      | 20.45  |
| $\text{O} + \text{CH}_4 \rightarrow \text{OH} + \text{CH}_3$                             | $V^f$            | 13.7            | -10.69  | -0.79    | 1.44       | 0.52   |

|                                                                                                       |       |      |        |        |        |        |
|-------------------------------------------------------------------------------------------------------|-------|------|--------|--------|--------|--------|
|                                                                                                       | $V^r$ | 8.1  | -9.27  | -0.57  | 1.68   | 0.61   |
| H + PH <sub>3</sub> → PH <sub>2</sub> + H <sub>2</sub>                                                | $V^f$ | 3.1  | -7.35  | -1.79  | -2.63  | -3.14  |
|                                                                                                       | $V^r$ | 23.2 | 9.24   | 17.91  | 21.58  | 20.38  |
| H + HO → H <sub>2</sub> + O                                                                           | $V^f$ | 10.7 | -1.69  | 3.75   | 1.60   | 1.48   |
|                                                                                                       | $V^r$ | 13.1 | -13.40 | -1.98  | 0.86   | 0.74   |
| H + H <sub>2</sub> S → H <sub>2</sub> + HS                                                            | $V^f$ | 3.5  | -6.73  | -1.22  | -2.20  | -2.59  |
|                                                                                                       | $V^r$ | 17.3 | -0.86  | 9.10   | 14.00  | 13.36  |
| O + HCl → OH + Cl                                                                                     | $V^f$ | 9.8  | -23.13 | -10.54 | -8.78  | -8.86  |
|                                                                                                       | $V^r$ | 10.4 | -19.55 | -7.33  | -3.75  | -3.83  |
| NH <sub>2</sub> + CH <sub>3</sub> → CH <sub>4</sub> + NH                                              | $V^f$ | 8.0  | -8.37  | 0.71   | 3.57   | 1.82   |
|                                                                                                       | $V^r$ | 22.4 | 2.16   | 10.56  | 13.31  | 11.66  |
| NH <sub>2</sub> + C <sub>2</sub> H <sub>5</sub> → C <sub>2</sub> H <sub>6</sub> + NH                  | $V^f$ | 7.5  | -5.76  | 2.89   | 5.94   | 3.56   |
|                                                                                                       | $V^r$ | 18.3 | -1.57  | 7.51   | 10.59  | 8.87   |
| C <sub>2</sub> H <sub>6</sub> + NH <sub>2</sub> → NH <sub>3</sub> + C <sub>2</sub> H <sub>5</sub>     | $V^f$ | 10.4 | -9.69  | 1.44   | 5.25   | 3.08   |
|                                                                                                       | $V^r$ | 17.4 | 2.91   | 9.99   | 12.72  | 9.94   |
| NH <sub>2</sub> + CH <sub>4</sub> → CH <sub>3</sub> + NH <sub>3</sub>                                 | $V^f$ | 14.5 | -6.16  | 4.39   | 7.99   | 6.04   |
|                                                                                                       | $V^r$ | 17.8 | 0.10   | 7.71   | 10.36  | 8.37   |
| <i>s-trans cis</i> -C <sub>5</sub> H <sub>8</sub> → <i>s-trans cis</i> -C <sub>5</sub> H <sub>8</sub> | $V^f$ | 38.4 | 25.00  | 31.19  | 35.82  | 34.69  |
|                                                                                                       | $V^r$ | 38.4 | 25.00  | 31.19  | 35.82  | 34.69  |
| MSE                                                                                                   |       |      | -17.90 | -9.67  | -7.84  | -8.89  |
| MAE                                                                                                   |       |      | 17.90  | 9.67   | 7.84   | 8.89   |
| rms                                                                                                   |       |      | 18.92  | 10.37  | 8.66   | 9.52   |
| Max(-)                                                                                                |       |      | -32.93 | -20.34 | -18.58 | -18.66 |
| Max(+)                                                                                                |       |      | -7.69  | -4.61  | -1.56  | -2.82  |

TABLE S4. Interaction energies (in kcal/mol) of the S22 set [9]. The counterpoise corrections are used to reduce the basis set superposition errors. Monomer deformation energies are not included.

| Complex [Symmetry]                                               | $\Delta E_{ref}$ | with $\theta^*$ |         |          |            |
|------------------------------------------------------------------|------------------|-----------------|---------|----------|------------|
|                                                                  |                  | TAO-LDA         | TAO-PBE | TAO-BLYP | TAO-BLYP-D |
| <b>Hydrogen bonded complexes</b>                                 |                  |                 |         |          |            |
| (NH <sub>3</sub> ) <sub>2</sub> [C <sub>2h</sub> ]               | -3.17            | -5.10           | -2.83   | -1.78    | -3.44      |
| (H <sub>2</sub> O) <sub>2</sub> [C <sub>s</sub> ]                | -5.02            | -7.78           | -4.91   | -3.99    | -4.92      |
| Formic acid dimer [C <sub>2h</sub> ]                             | -18.61           | -26.82          | -18.08  | -15.48   | -18.50     |
| Formamide dimer [C <sub>2h</sub> ]                               | -15.96           | -21.82          | -14.69  | -12.44   | -15.63     |
| Uracil dimer [C <sub>2h</sub> ]                                  | -20.65           | -26.15          | -18.46  | -16.21   | -20.21     |
| 2-pyridoxine-2-aminopyridine [C <sub>1</sub> ]                   | -16.71           | -22.74          | -15.24  | -12.48   | -17.25     |
| Adenine-thymine WC [C <sub>1</sub> ]                             | -16.37           | -21.91          | -14.21  | -11.33   | -16.42     |
| <b>Dispersion complexes</b>                                      |                  |                 |         |          |            |
| (CH <sub>4</sub> ) <sub>2</sub> [D <sub>3d</sub> ]               | -0.53            | -0.83           | -0.08   | 0.68     | -0.31      |
| (C <sub>2</sub> H <sub>4</sub> ) <sub>2</sub> [D <sub>2d</sub> ] | -1.51            | -2.49           | -0.31   | 1.12     | -1.44      |
| Benzene·CH <sub>4</sub> [C <sub>3</sub> ]                        | -1.50            | -2.01           | -0.01   | 1.39     | -1.23      |
| Benzene dimer [C <sub>2h</sub> ]                                 | -2.73            | -2.63           | 1.90    | 4.93     | -1.93      |
| Pyrazine dimer [C <sub>s</sub> ]                                 | -4.42            | -4.40           | 0.76    | 3.82     | -3.63      |
| Uracil dimer [C <sub>2</sub> ]                                   | -10.12           | -10.14          | -2.69   | 1.13     | -9.68      |
| Indole·benzene [C <sub>1</sub> ]                                 | -5.22            | -4.37           | 2.26    | 6.33     | -3.91      |
| Adenine·thymine stack [C <sub>1</sub> ]                          | -12.23           | -11.92          | -1.30   | 4.10     | -11.77     |
| <b>Mixed complexes</b>                                           |                  |                 |         |          |            |
| Ethene·ethine [C <sub>2v</sub> ]                                 | -1.53            | -2.27           | -1.16   | -0.29    | -1.49      |
| Benzene·H <sub>2</sub> O [C <sub>s</sub> ]                       | -3.28            | -4.44           | -2.04   | -0.49    | -3.30      |
| Benzene·NH <sub>3</sub> [C <sub>s</sub> ]                        | -2.35            | -3.03           | -0.92   | 0.55     | -2.18      |

|                                  |       |       |       |       |       |
|----------------------------------|-------|-------|-------|-------|-------|
| Benzene·HCN [ $C_s$ ]            | -4.46 | -5.85 | -2.81 | -0.94 | -4.65 |
| Benzene dimer [ $C_{2v}$ ]       | -2.74 | -3.06 | -0.10 | 1.86  | -2.52 |
| Indole·benzene T-shape [ $C_1$ ] | -5.73 | -6.07 | -1.86 | 0.84  | -5.52 |
| Phenol dimer [ $C_1$ ]           | -7.05 | -8.99 | -3.85 | -1.73 | -6.64 |
| MSE                              |       | -1.95 | 2.78  | 5.07  | 0.24  |
| MAE                              |       | 2.07  | 2.78  | 5.07  | 0.34  |
| rms                              |       | 3.17  | 3.90  | 6.33  | 0.45  |
| Max(-)                           |       | -8.21 | 0.11  | 1.03  | -0.54 |
| Max(+)                           |       | 0.85  | 10.93 | 16.33 | 1.31  |
